# Supplementary material
Source: PubMed Central journal article supplement (PMC7484128)

# Unprocessed Blots Extended Data Figure 3

## Ex Fig 3b

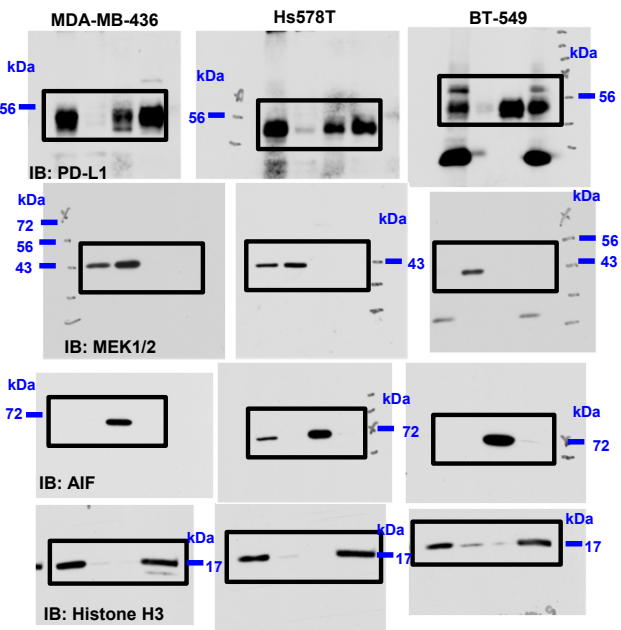

## Ex Fig 3c

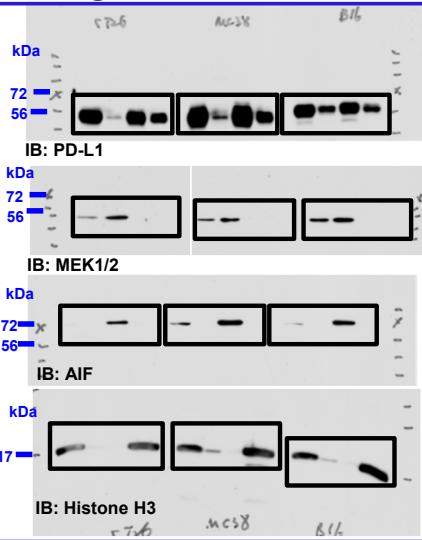

## Ex Fig 3d

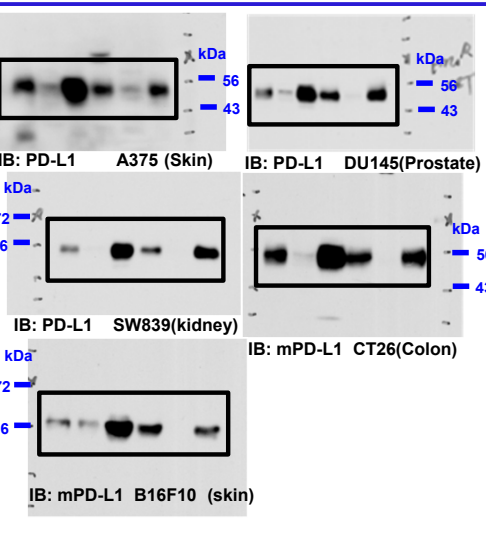

## Ex Fig 3f

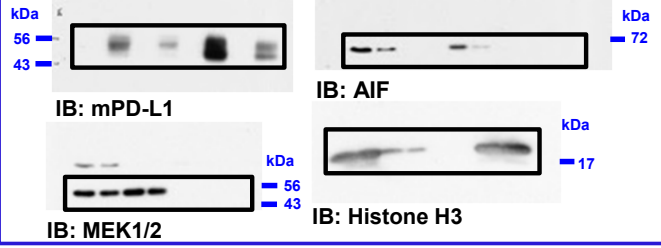

## Ex Fig 3g

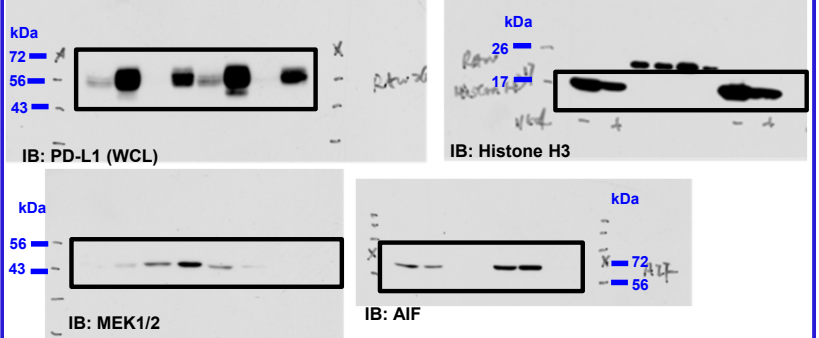

## Ex Fig 3h

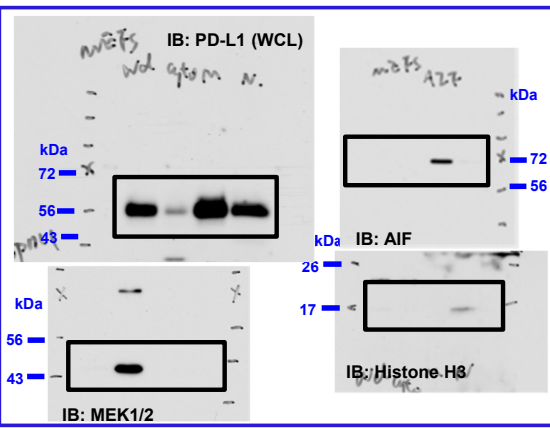

## Ex Fig 3m

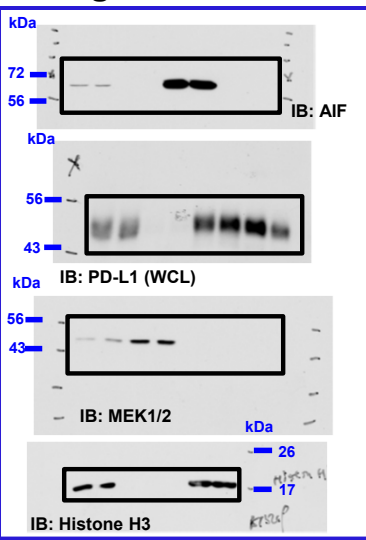

## Ex Fig 3l

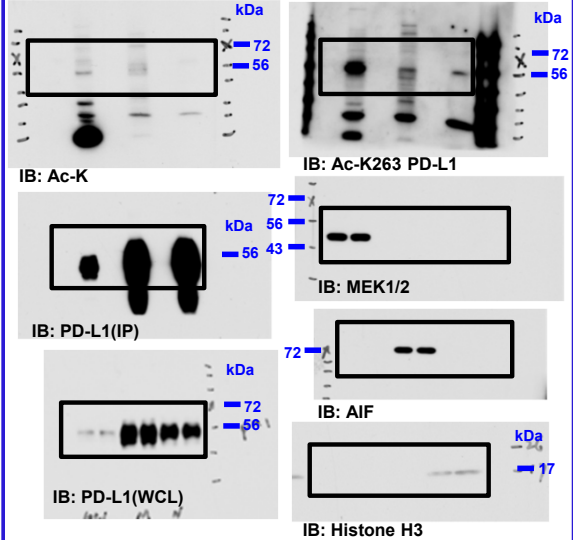

## Ex Fig 3n

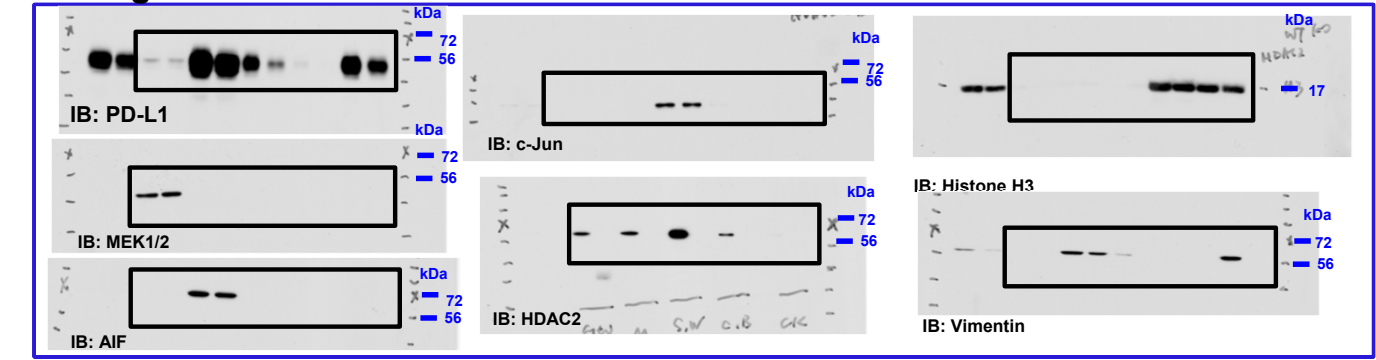

Supplement: NIHMS1613951-supplement-1613951_SourceData_ExtData_Fig3.pdf [file NIHMS1613951-supplement-1613951_SourceData_ExtData_Fig3.pdf]
