# Supplementary material
Source: PubMed Central journal article supplement (PMC7484128)

# Unprocessed Blots Extended Data Figure 4

## Ex Fig 4b

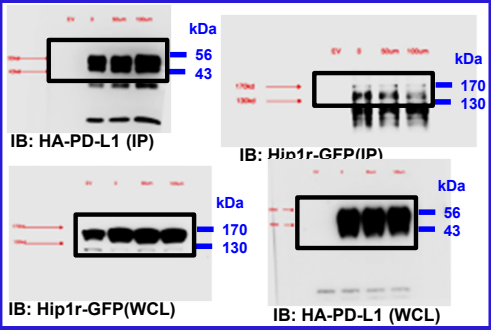

## Ex Fig 4c

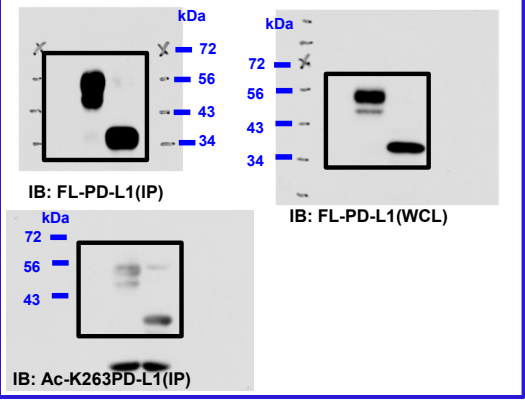

## Ex Fig 4d

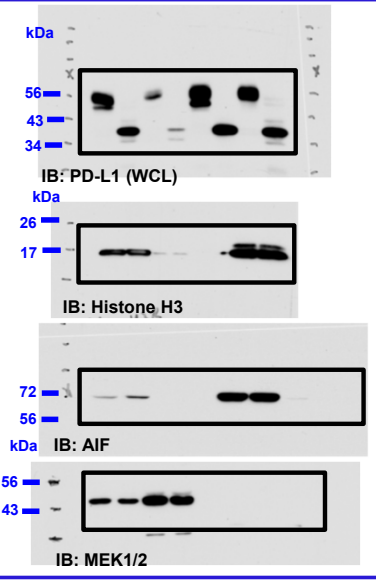

## Ex Fig 4f (SKBR3)

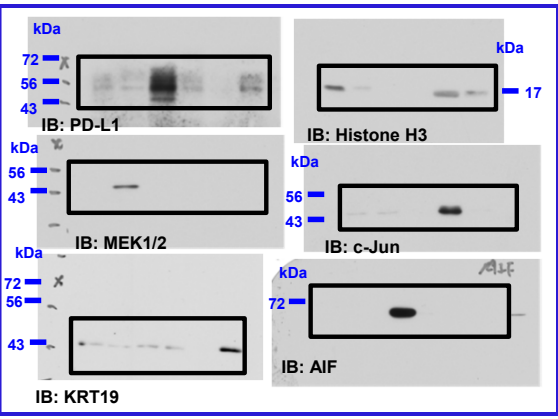

## Ex Fig 4f (BT-20)

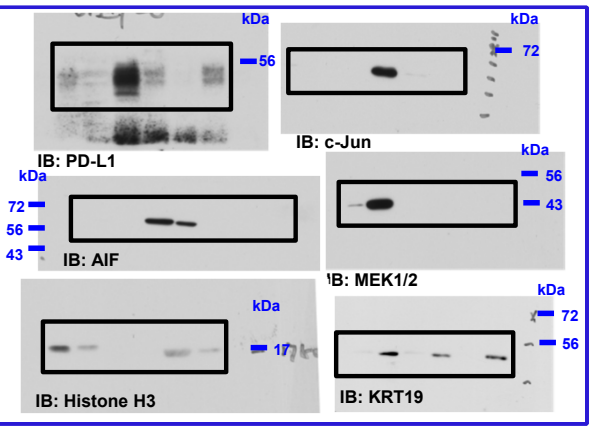

## Ex Fig 4i

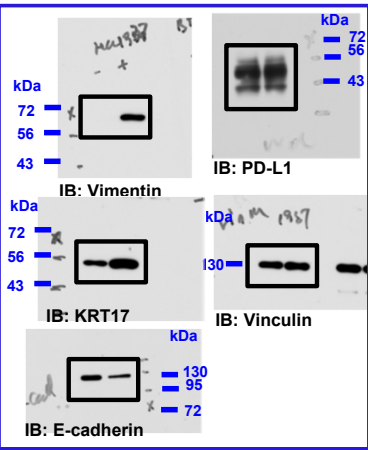

## Ex Fig 4h

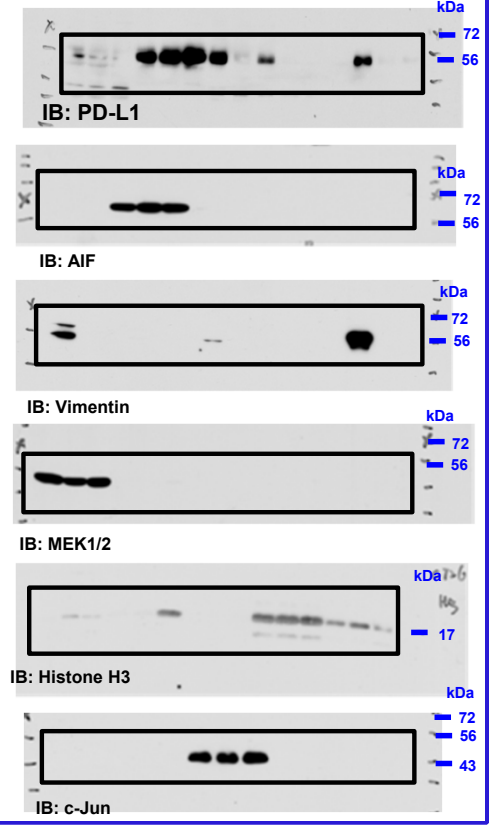

## Ex Fig 4j

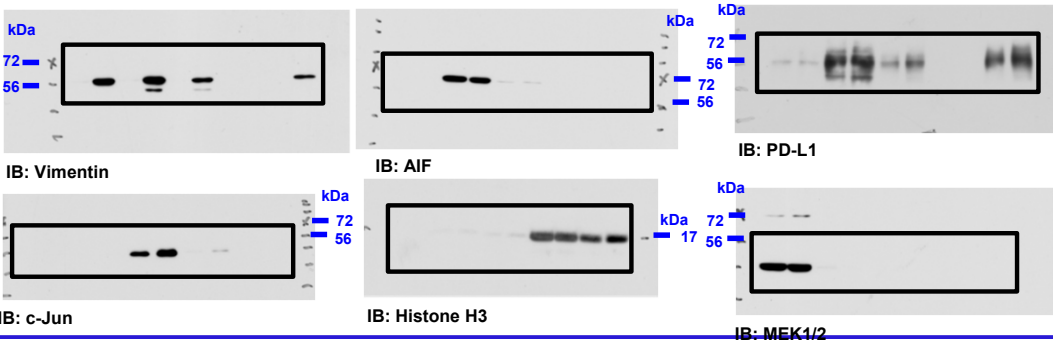

## Ex Fig 4k

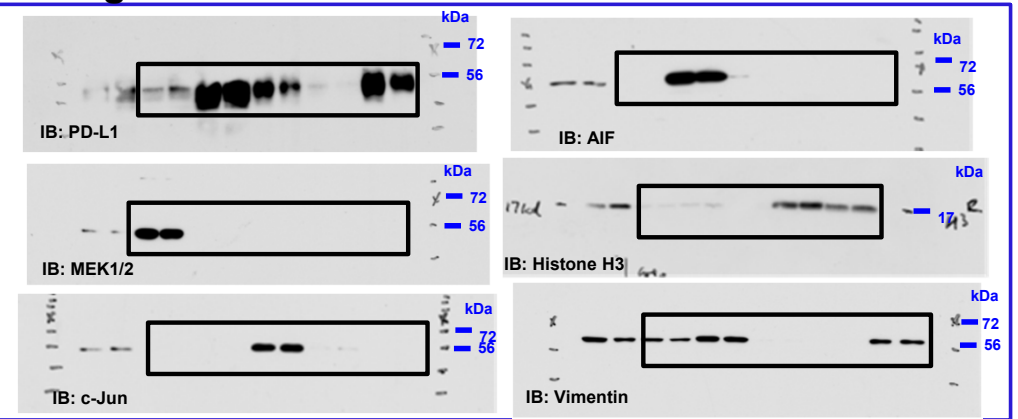

Supplement: NIHMS1613951-supplement-1613951_SourceData_ExtData_Fig4.pdf [file NIHMS1613951-supplement-1613951_SourceData_ExtData_Fig4.pdf]
