# Supplementary material
Source: PubMed Central journal article supplement (PMC7484128)

# Unprocessed Blots Figure 5

**Fig 5a**

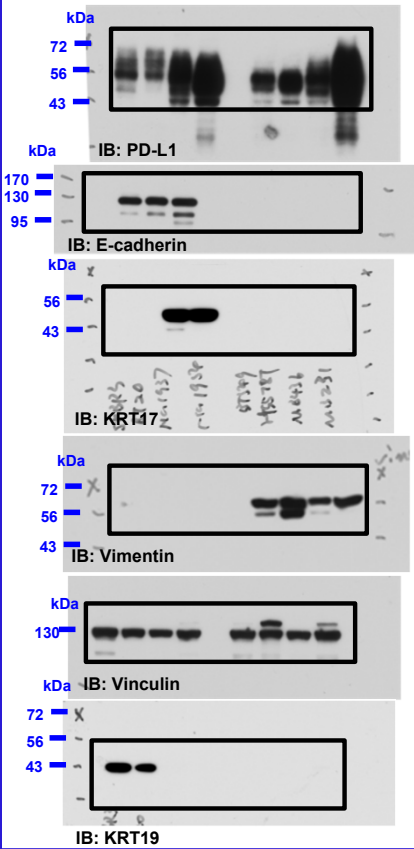

**Fig 5b(HCC1937)**

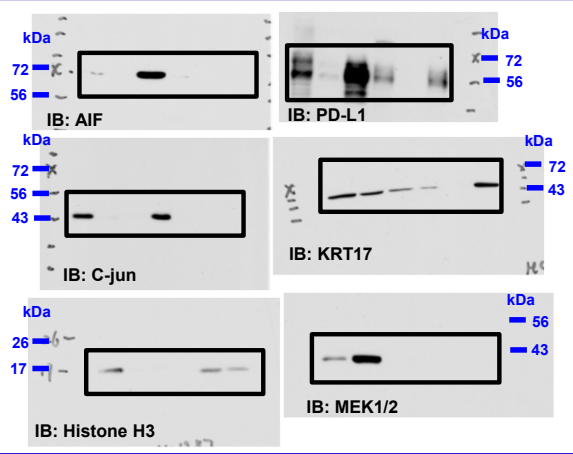

**Fig 5b(HCC1954)**

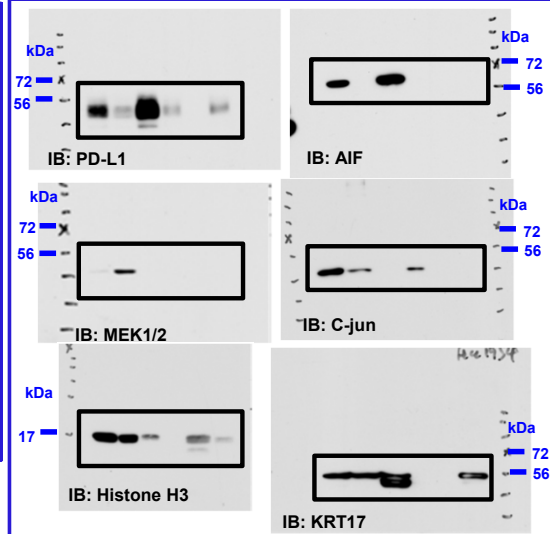

**Fig 5c (Hs578T)**

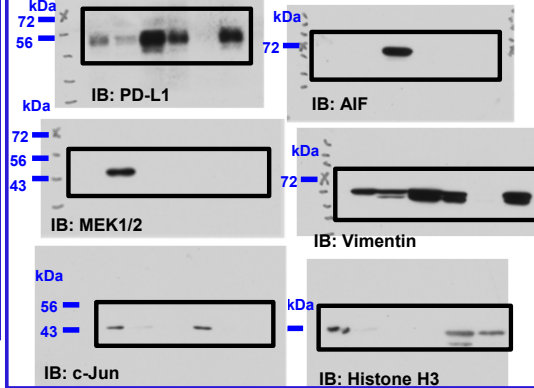

**Fig 5c (MDA-MB-436)**

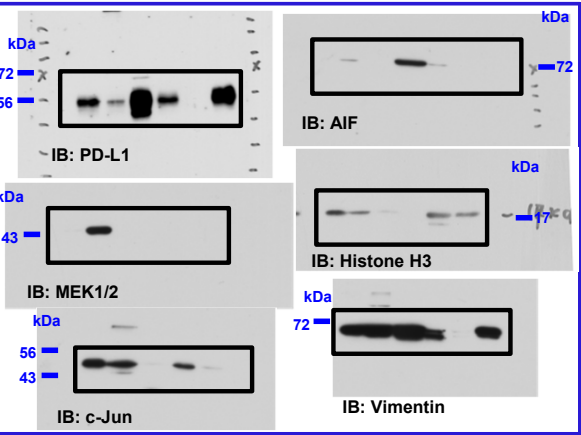

**Fig 5d**

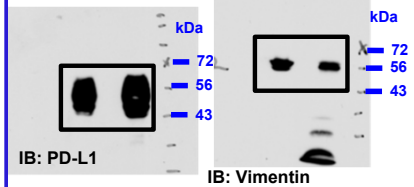

**Fig 5e**

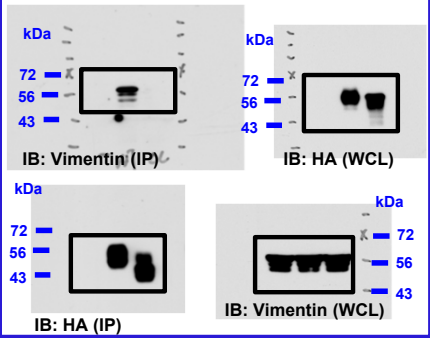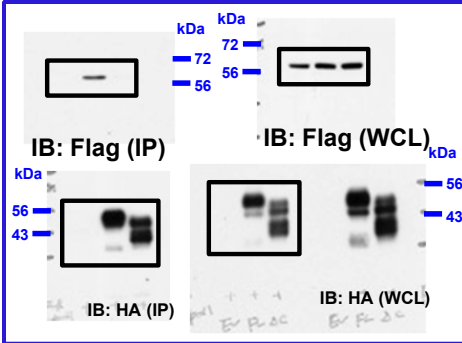

**Fig 5i**

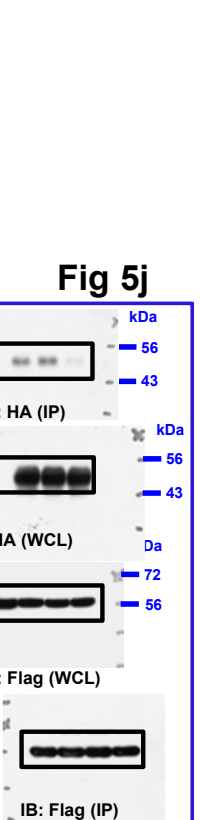

**Fig 5f**

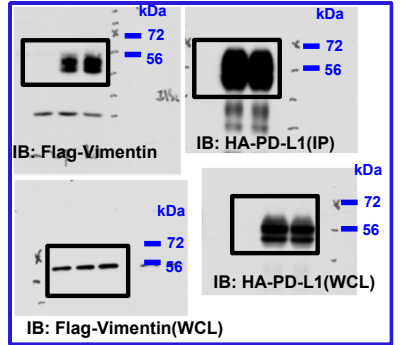

**Fig 5g**

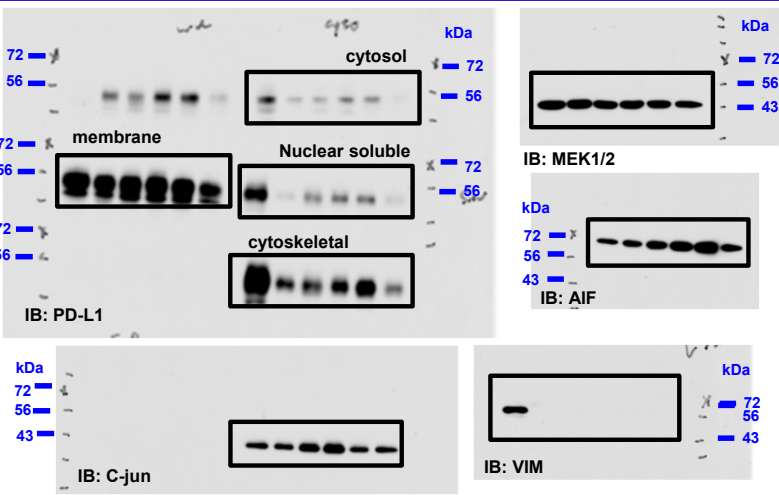

**Fig 5j**

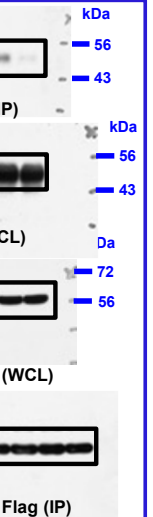

**Fig 5h**

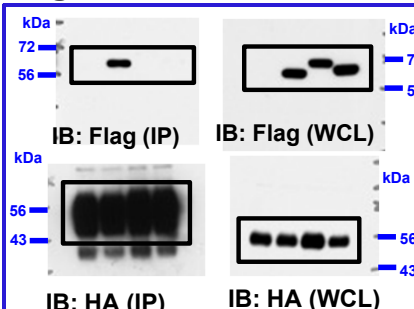

Supplement: NIHMS1613951-supplement-1613951_SourceData_Fig5.pdf [file NIHMS1613951-supplement-1613951_SourceData_Fig5.pdf]
