# Supplementary material
Source: PubMed Central journal article supplement (PMC7484128)

# Unprocessed Blots Extended Data Figure 1

## Ex Fig 1a

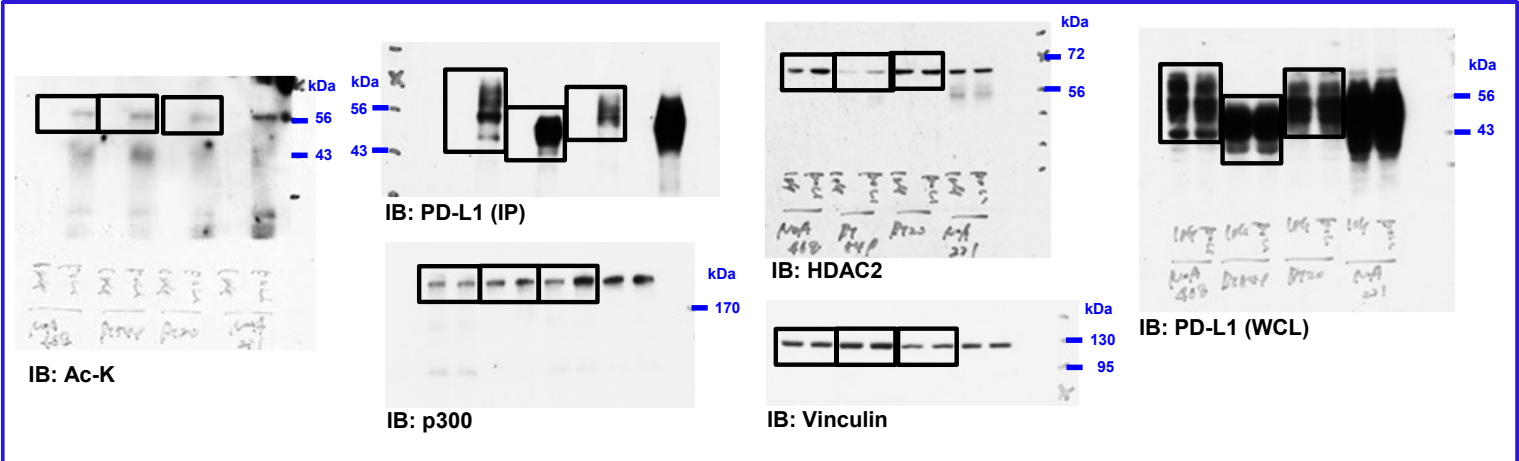

## Ex Fig 1c

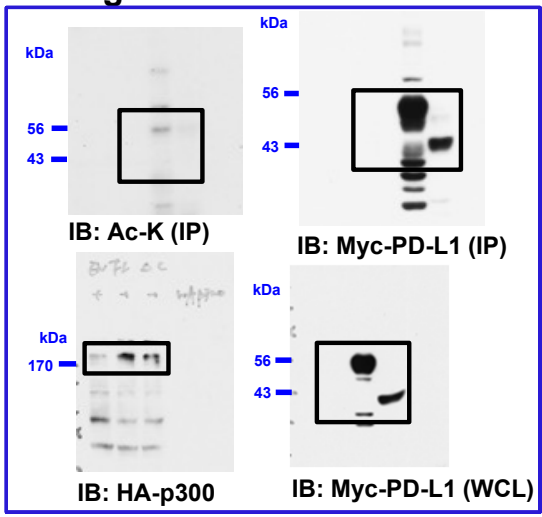

## Ex Fig 1d

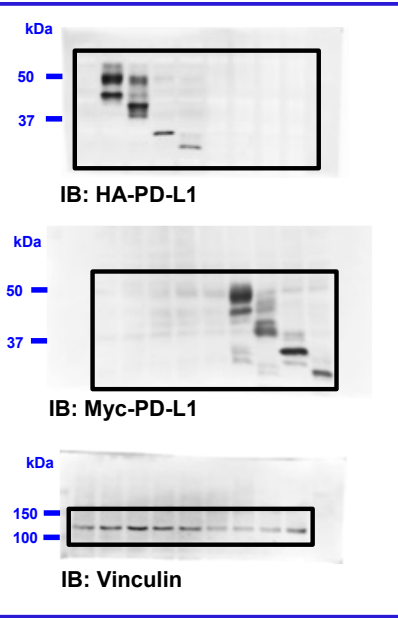

## Ex Fig 1g

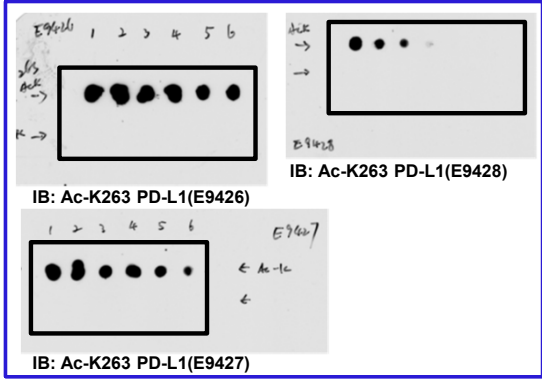

## Ex Fig 1h

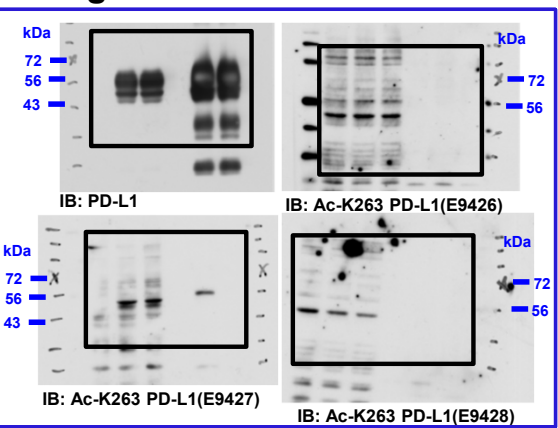

Supplement: NIHMS1613951-supplement-1613951_SourceData_ExtData_Fig1.pdf [file NIHMS1613951-supplement-1613951_SourceData_ExtData_Fig1.pdf]

# Unprocessed Blots Extended Data Figure 2

## Ex Fig 2a

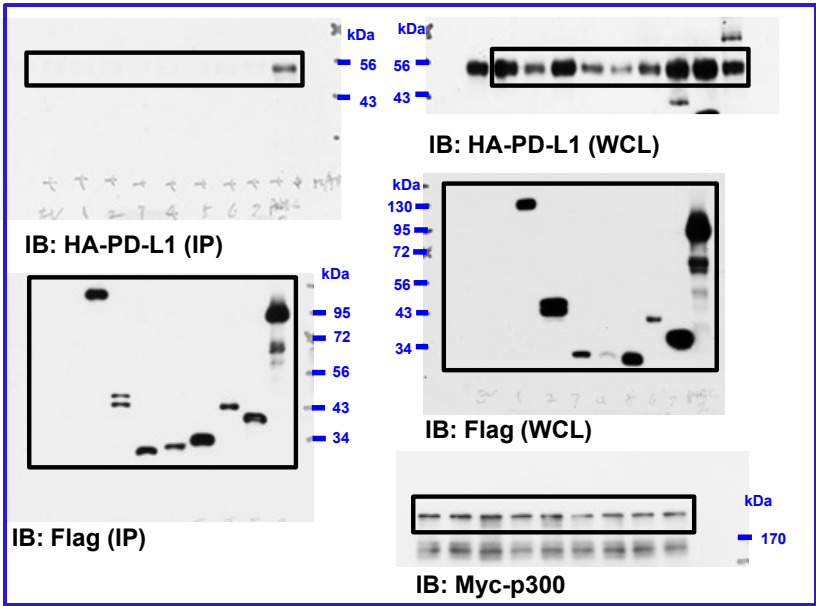

## Ex Fig 2b

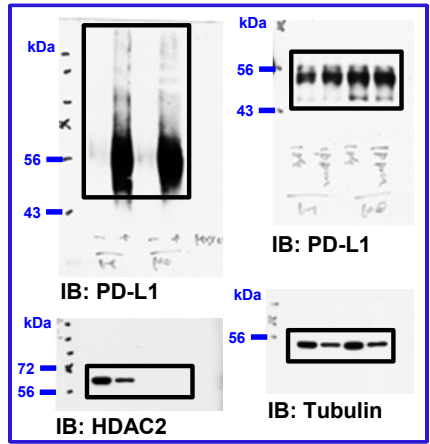

## Ex Fig 2c

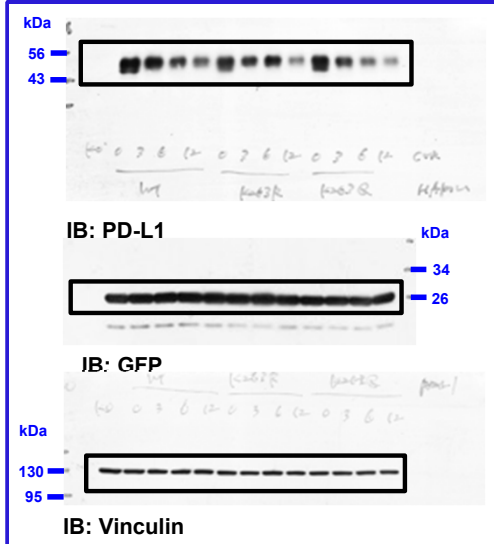

## Ex Fig 2e

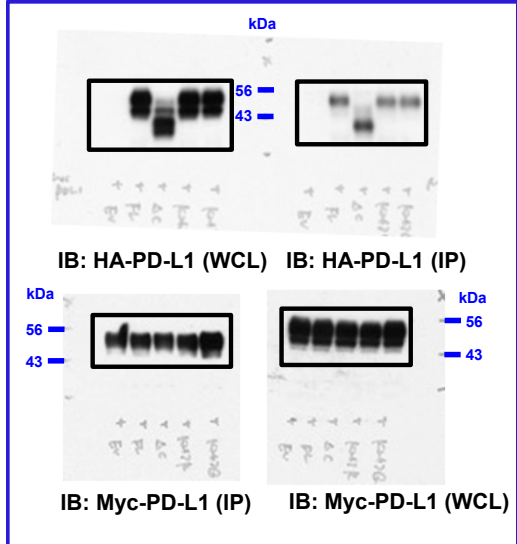

Supplement: NIHMS1613951-supplement-1613951_SourceData_ExtData_Fig2.pdf [file NIHMS1613951-supplement-1613951_SourceData_ExtData_Fig2.pdf]

# Unprocessed Blots Extended Data Figure 5

**Ex Fig 5a**

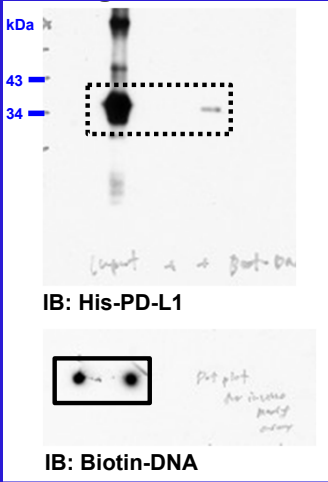

**Ex Fig 5b**

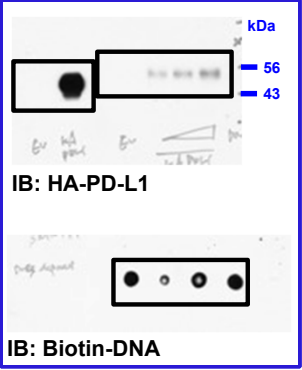

**Ex Fig 5c**

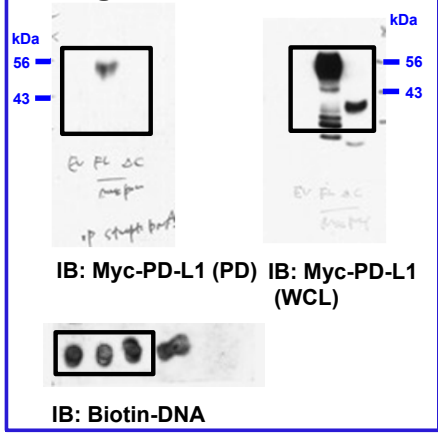

**Ex Fig 5d**

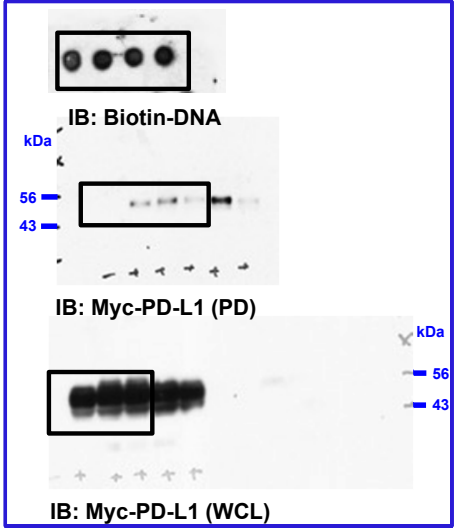

**Ex Fig 5o**

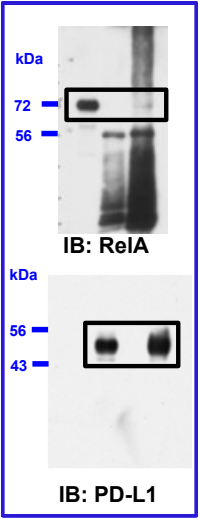

**Ex Fig 5p**

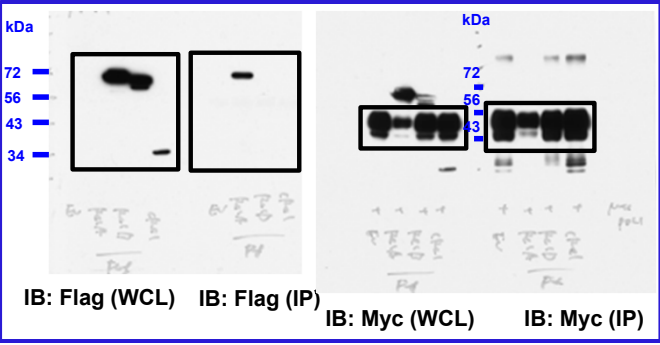

**Ex Fig 5q**

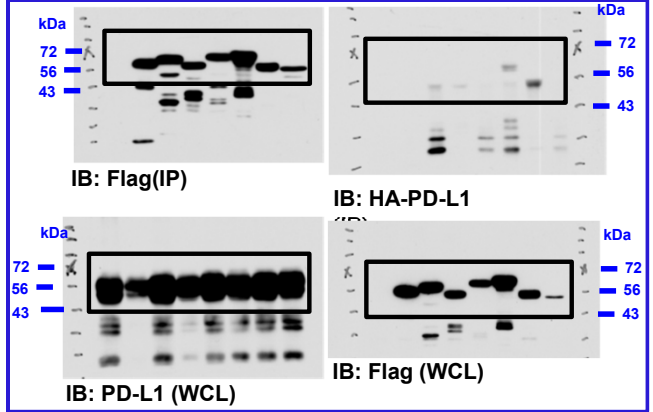

Supplement: NIHMS1613951-supplement-1613951_SourceData_ExtData_Fig5.pdf [file NIHMS1613951-supplement-1613951_SourceData_ExtData_Fig5.pdf]

# Unprocessed Blots Extended Data Figure 6

**Ex Fig 6b**

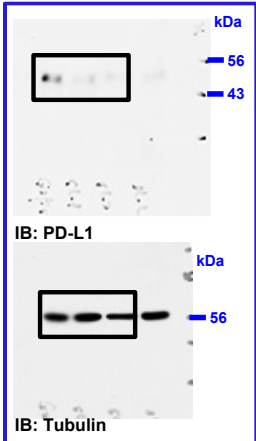

**Ex Fig 6c**

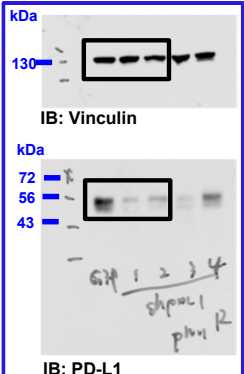

**Ex Fig 6e**

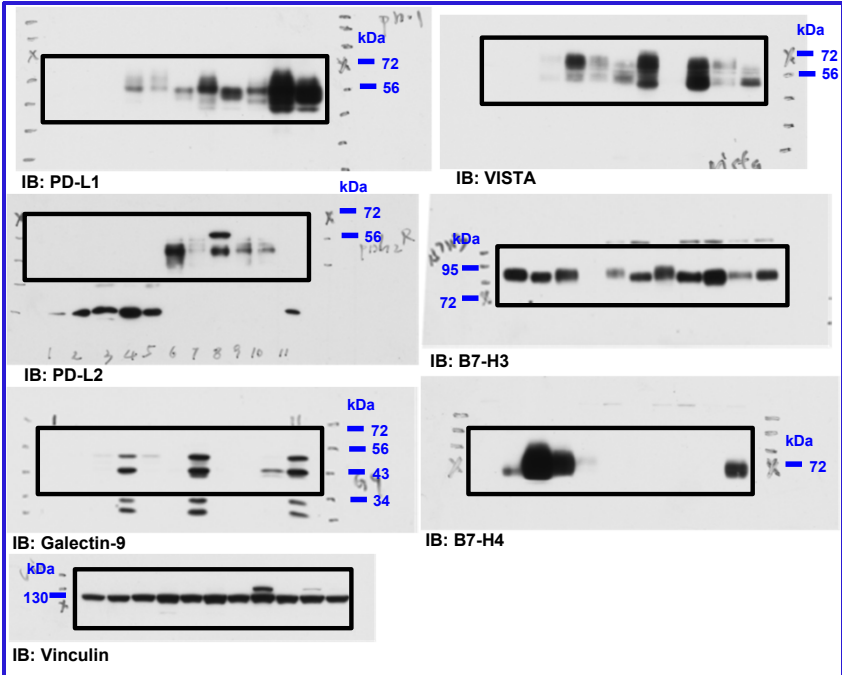

Supplement: NIHMS1613951-supplement-1613951_SourceData_ExtData_Fig6.pdf [file NIHMS1613951-supplement-1613951_SourceData_ExtData_Fig6.pdf]

# Unprocessed Blots Figure 1

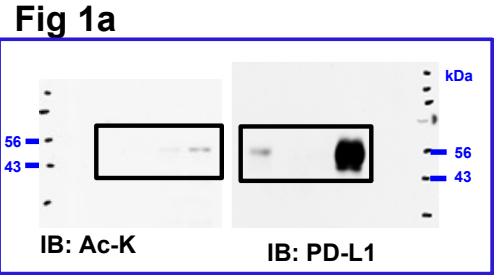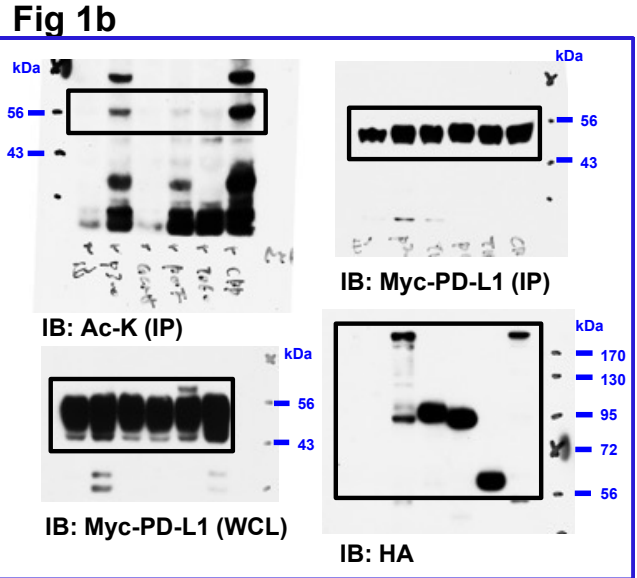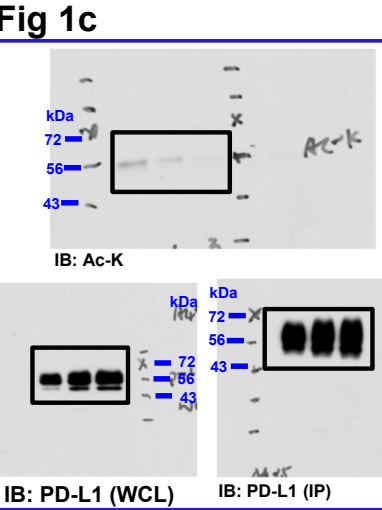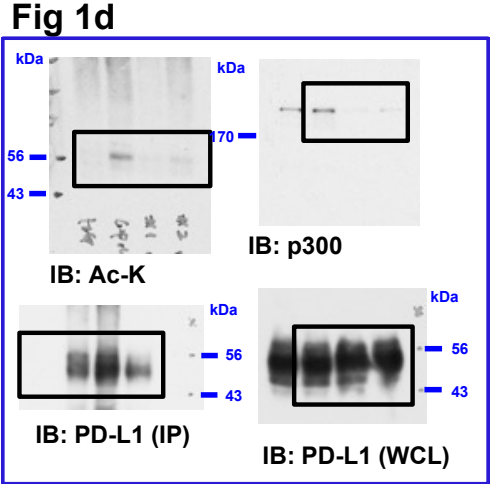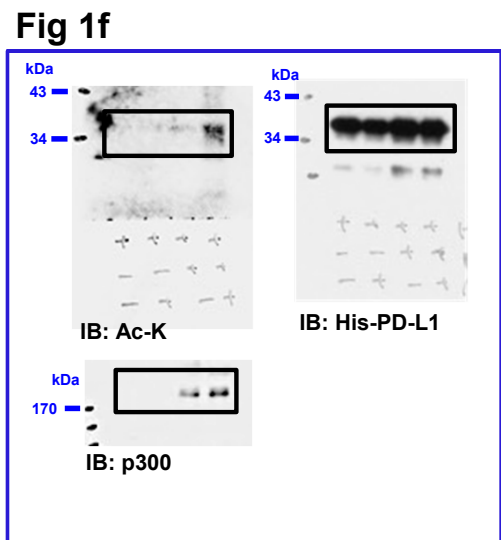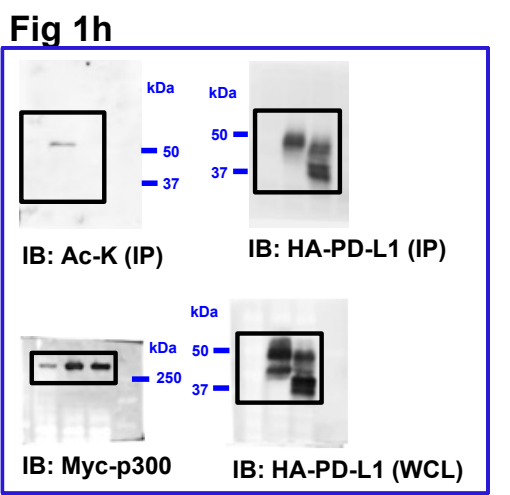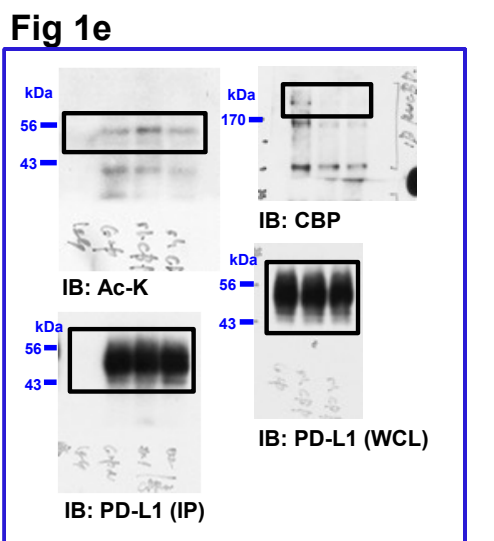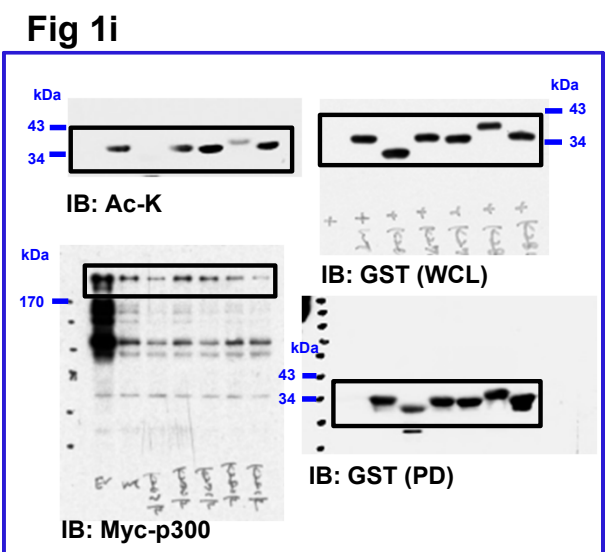

Supplement: NIHMS1613951-supplement-1613951_SourceData_Fig1.pdf [file NIHMS1613951-supplement-1613951_SourceData_Fig1.pdf]

# Unprocessed Blots Figure 2

**Fig 2a**

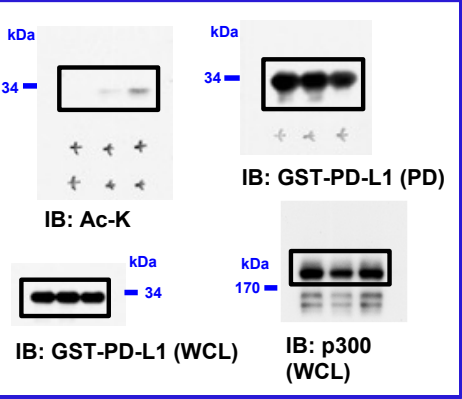

**Fig 2b**

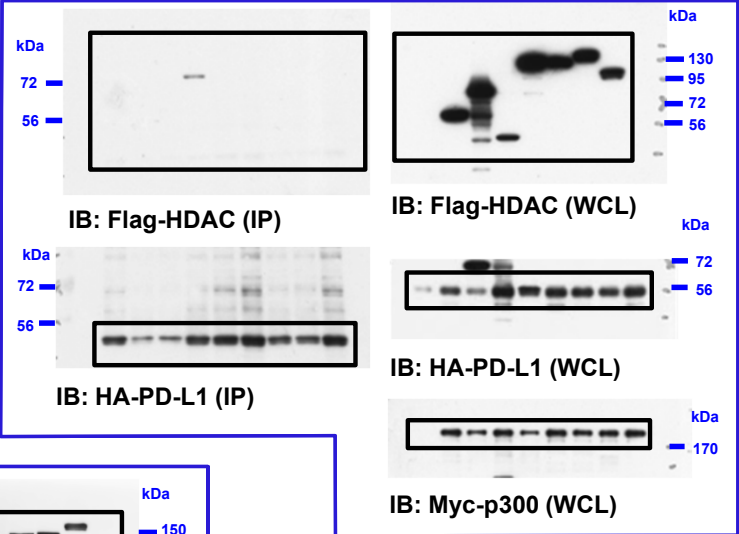

**Fig 2d**

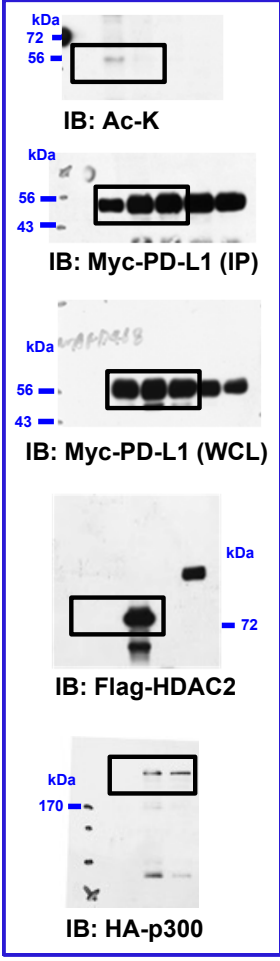

**Fig 2c**

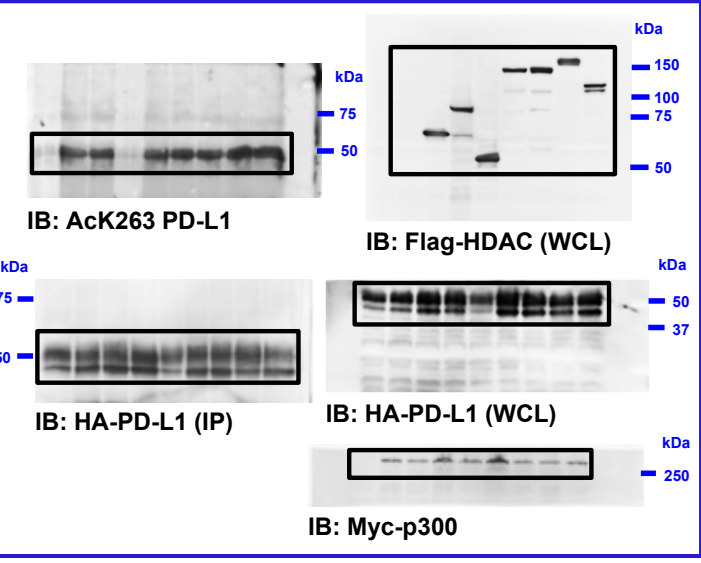

**Fig 2e**

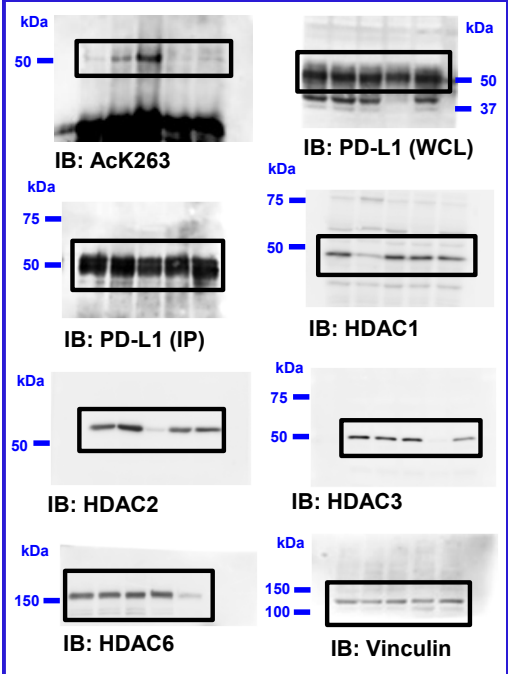

**Fig 2f**

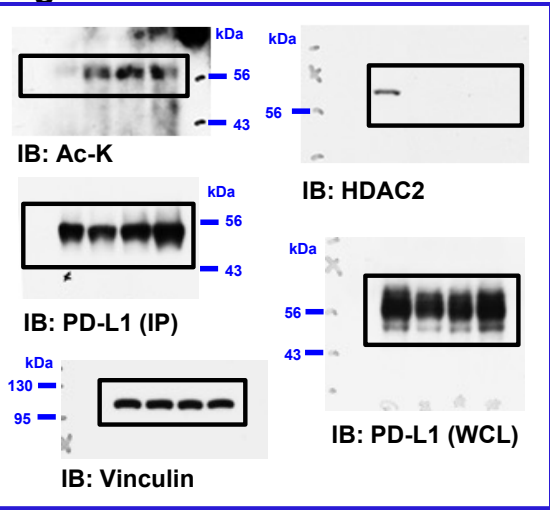

**Fig 2g**

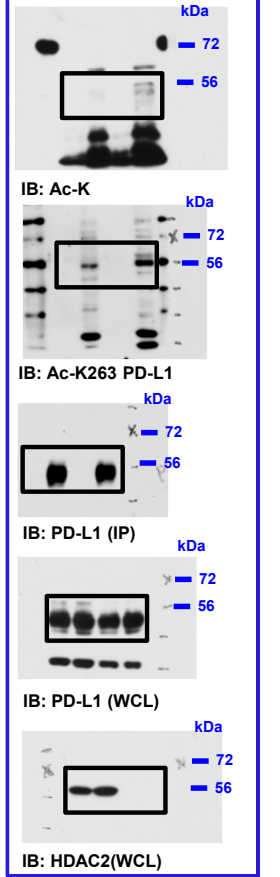

**Fig 2h**

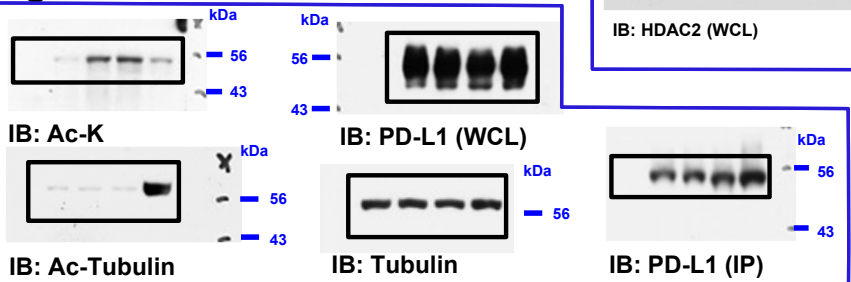

**Fig 2i**

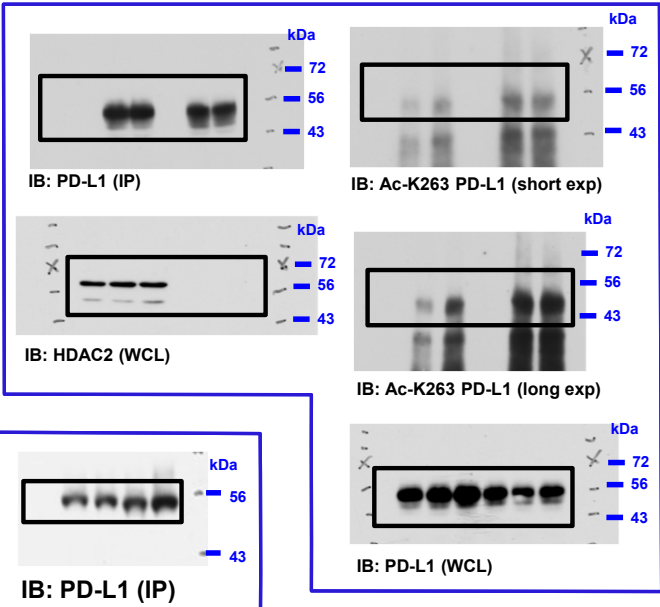

Supplement: NIHMS1613951-supplement-1613951_SourceData_Fig2.pdf [file NIHMS1613951-supplement-1613951_SourceData_Fig2.pdf]

# Unprocessed Blots Figure 3

**Fig 3b (MDA-MB-231)**

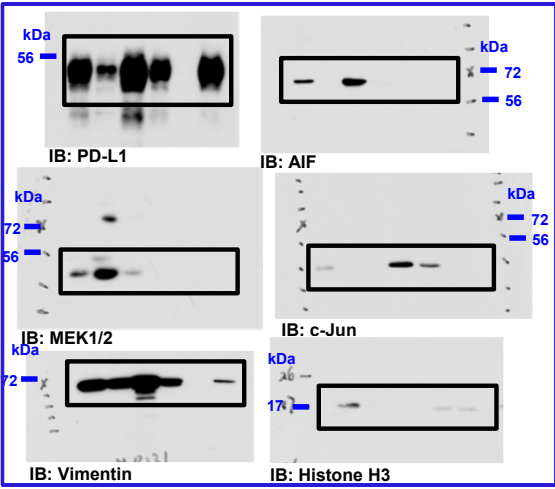

**Fig 3b (BT-549)**

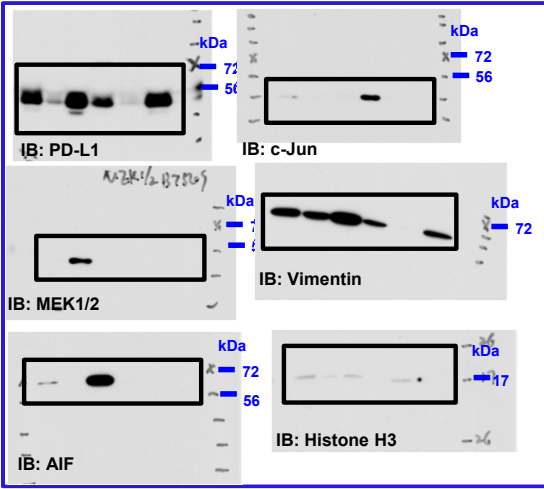

**Fig 3c**

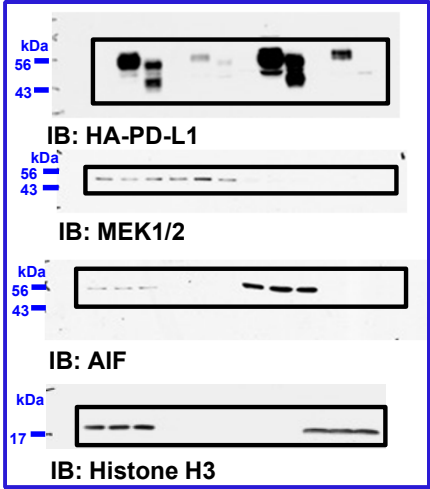

**Fig 3a**

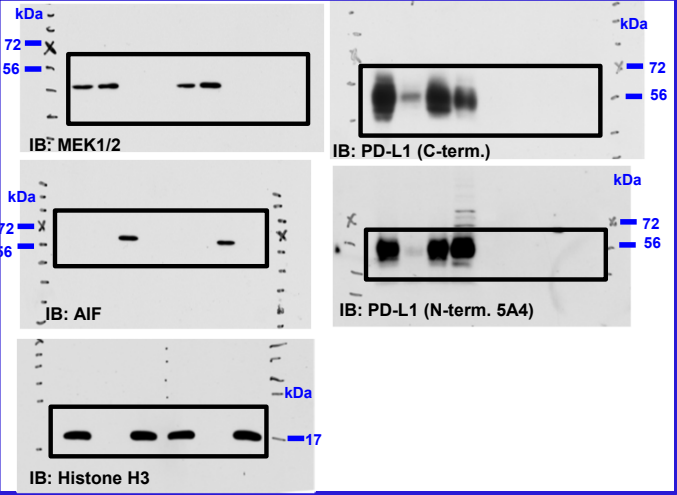

**Fig 3e**

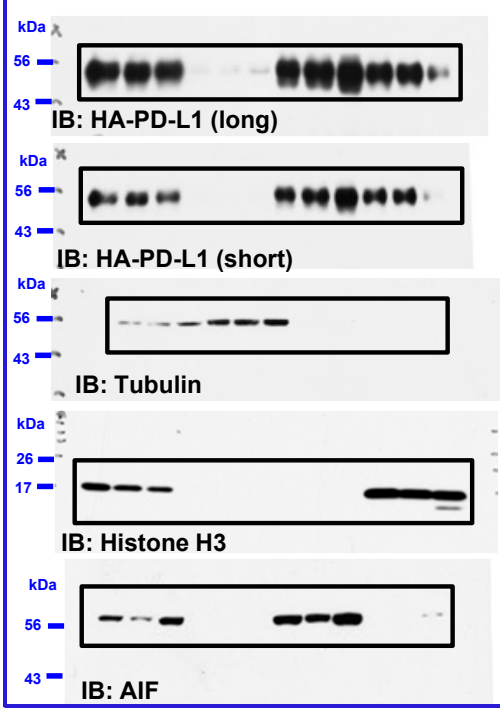

**Fig 3f**

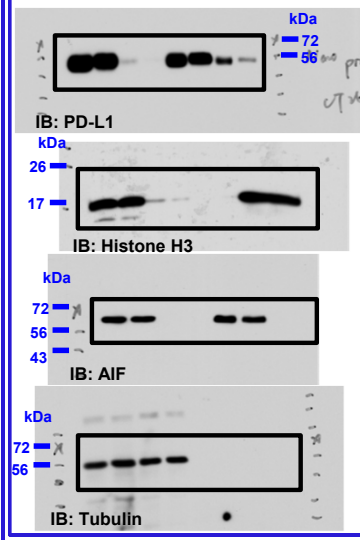

**Fig 3g**

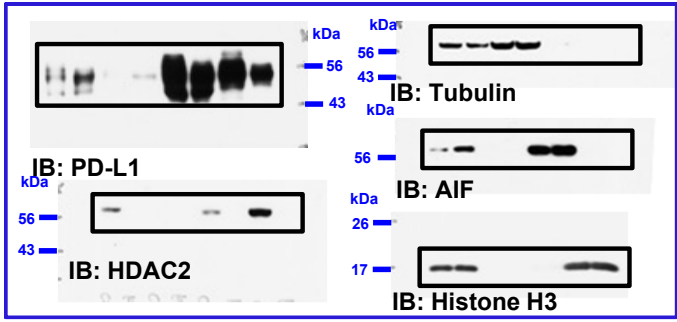

**Fig 3i**

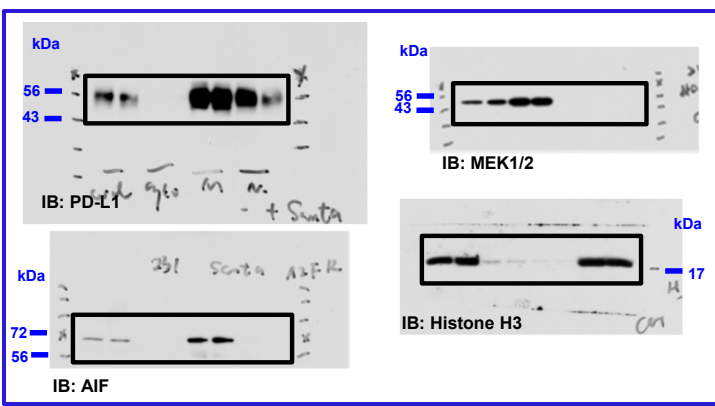

**Fig 3h**

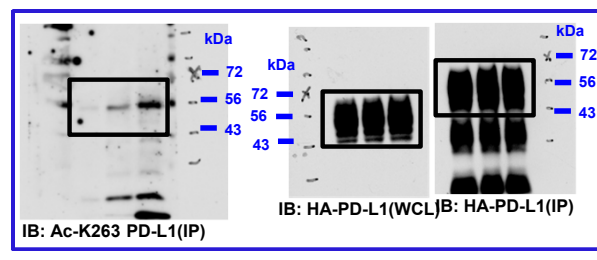

Supplement: NIHMS1613951-supplement-1613951_SourceData_Fig3.pdf [file NIHMS1613951-supplement-1613951_SourceData_Fig3.pdf]

# Unprocessed Blots Figure 4

**Fig 4a**

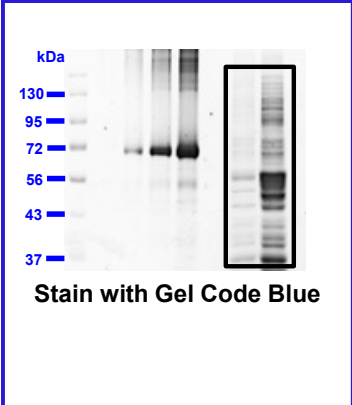

**Fig 4c**

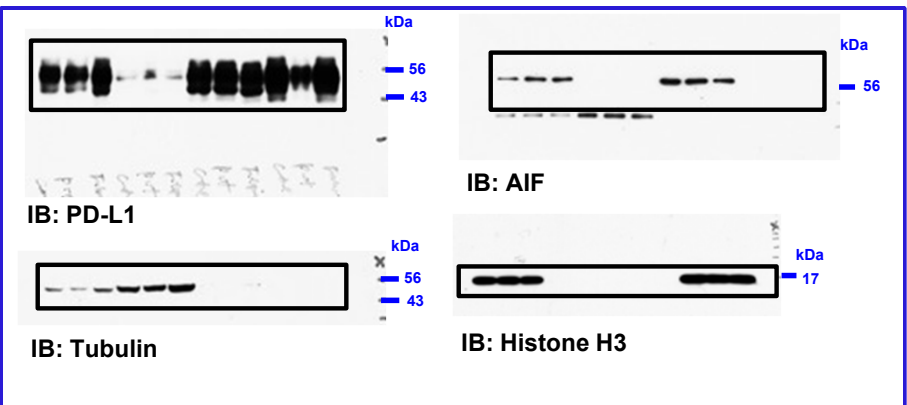

**Fig 4d**

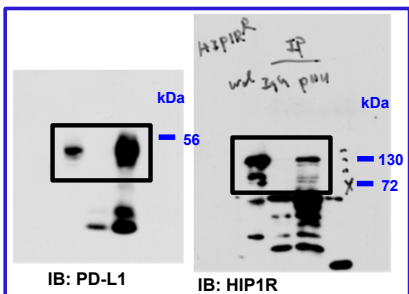

**Fig 4e**

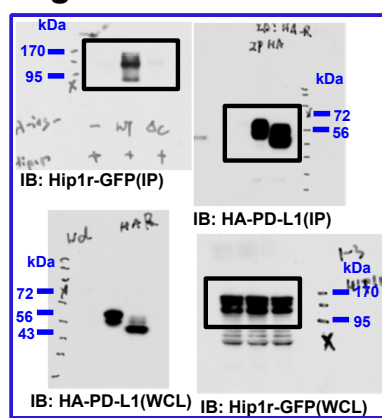

**Fig 4f**

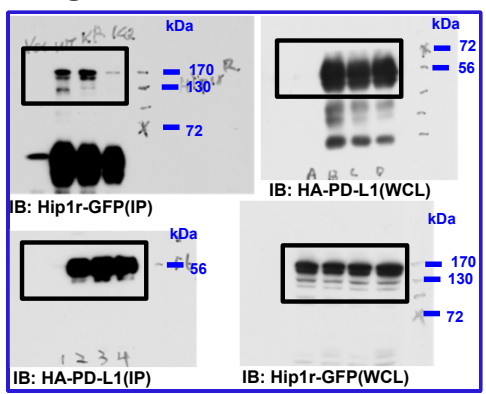

**Fig 4g**

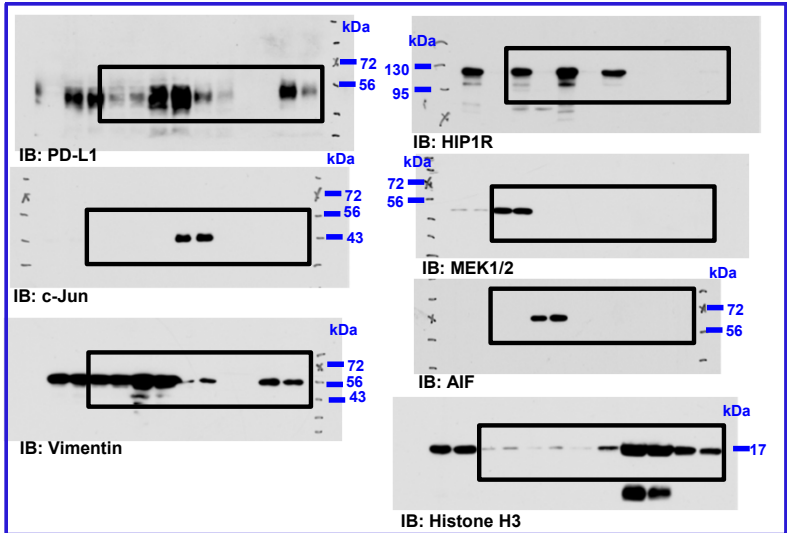

**Fig 4h**

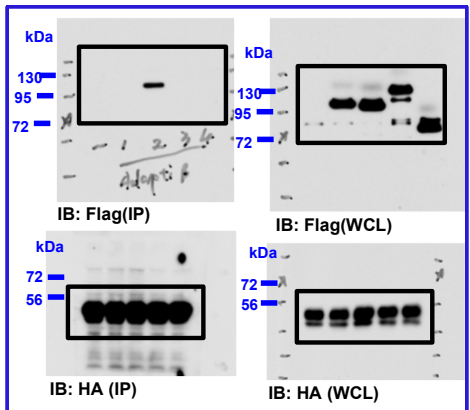

**Fig 4j**

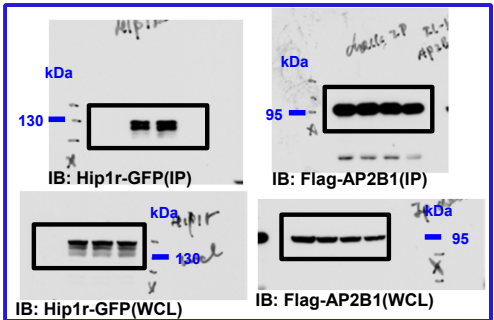

Supplement: NIHMS1613951-supplement-1613951_SourceData_Fig4.pdf [file NIHMS1613951-supplement-1613951_SourceData_Fig4.pdf]

# Unprocessed Blots Figure 7

## Fig 7d

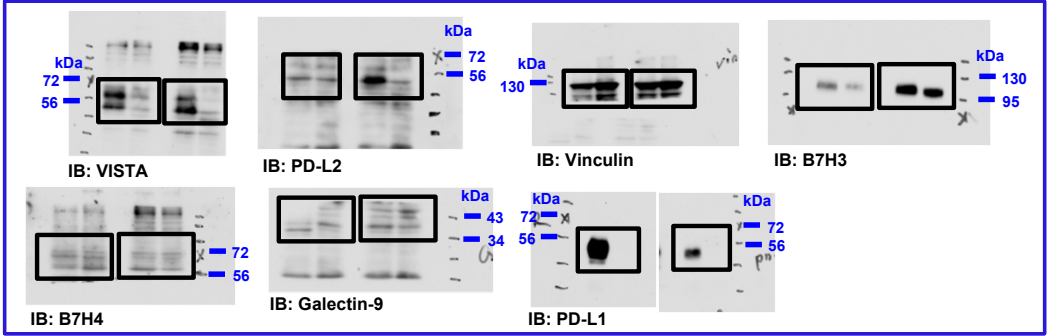

Supplement: NIHMS1613951-supplement-1613951_SourceData_Fig7.pdf [file NIHMS1613951-supplement-1613951_SourceData_Fig7.pdf]
